# Supplementary material
Source: Springer Nature journal article supplement (https://www.springermedizin.de/resource/supplementary/13229_2013_164_MOESM2_ESM.pdf/9676162)

### Phase I

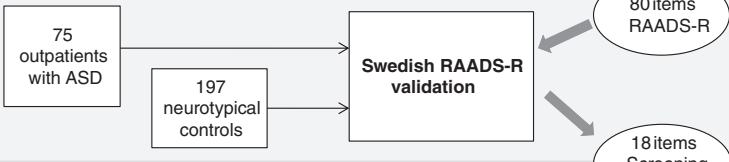

### Phase II

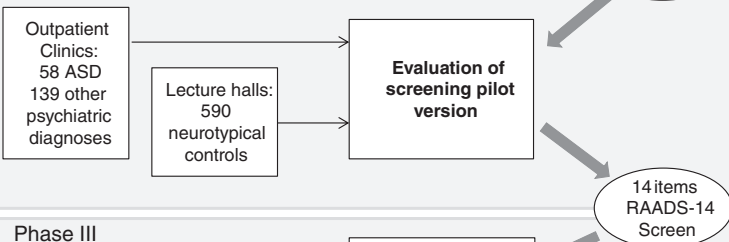

### Phase III

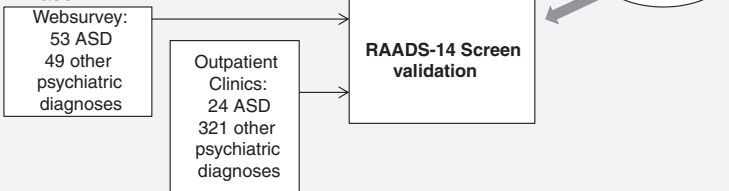

Supplement: MOESM2 [file 9676162]
